# Supplementary material for: Identification of Lactobacillus plantarum genes modulating the cytokine response of human peripheral blood mononuclear cells
Source: Springer Nature journal article supplement (doi:10.1186/1471-2180-10-293), 2010-11-16

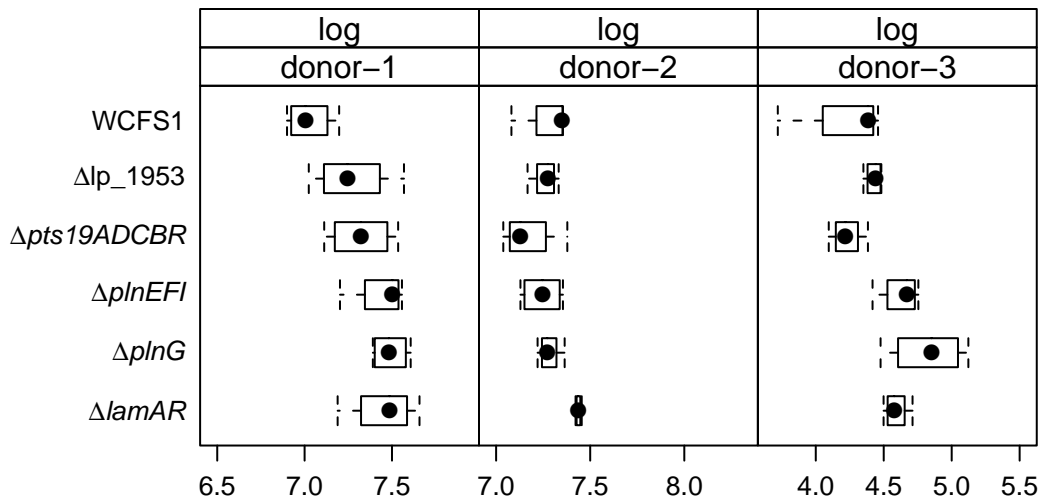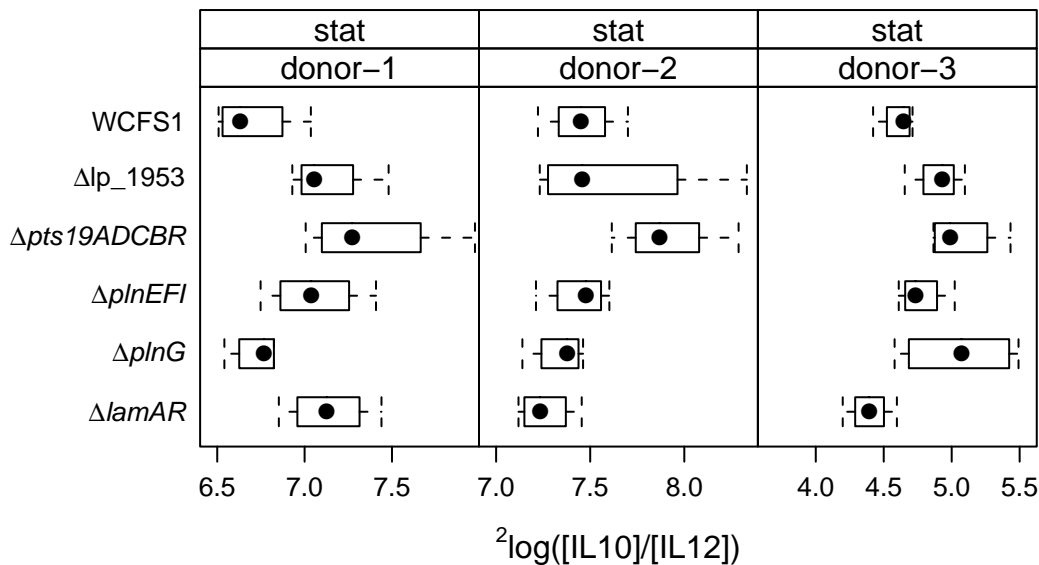

Supplement: 12866_2010_1249_MOESM4_ESM.pdf [file 12866_2010_1249_MOESM4_ESM.pdf]
